# Supplementary material for: Infrared 3D Thermography for Inflammation Detection in Diabetic Foot Disease: A Proof of Concept
Source: PubMed Central journal article supplement — J Diabetes Sci Technol. 2019 Jun 14;14(1):46–54. doi: 10.1177/1932296819854062 (PMC7189170; doi:10.1177/1932296819854062), 2019-06-14

## Infrared 3D thermography for inflammation detection in diabetic foot disease

Thermal:

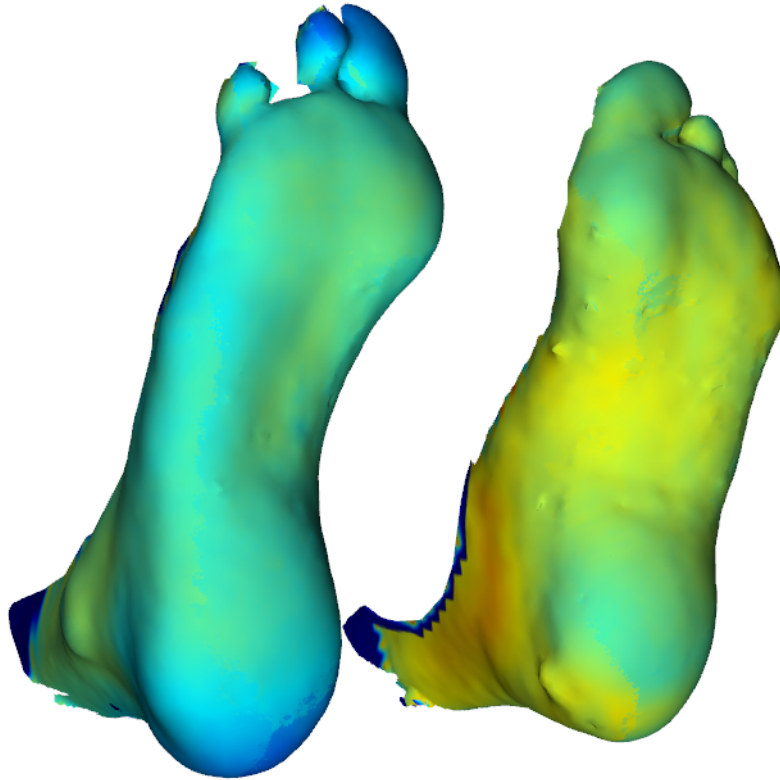

Original:

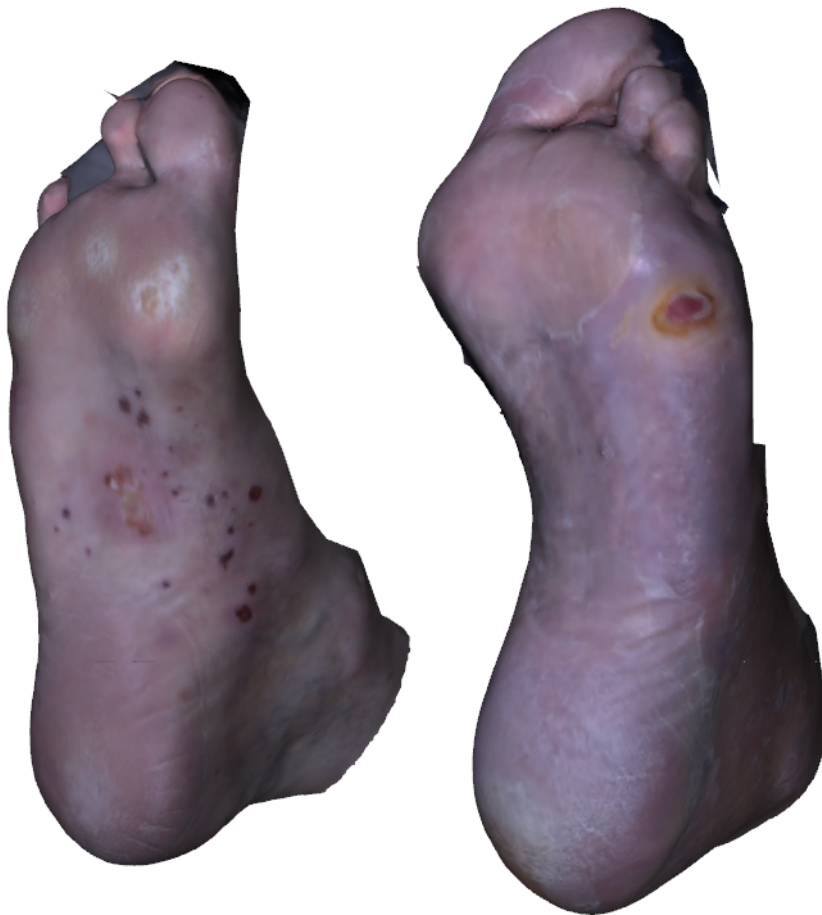

Supplement: vanDoremalen_et_al._Case1.pdf [file vanDoremalen_et_al._Case1.pdf]
